# Supplementary material for: Unique thermal properties of polyvinyl alcohol embedded with reduced graphene oxide-copper nanoparticles composite
Source: Research Square preprint supplement (doi:10.21203/rs.3.rs-8463163/v1), 2026-01-19
Supplement: Supplementary file 1 [file 6f18a1008e63eb3df63568f1.docx]

**Unique thermal properties of polyvinyl alcohol embedded with reduced graphene oxide-copper nanoparticles composite**

**Roghayeh Tayebi, Esmaiel Soleimani***

*Inorganic Chemistry Research Laboratory, Faculty of Chemistry, Shahrood University of Technology, Shahrood, Iran*

**Supplementary Information**


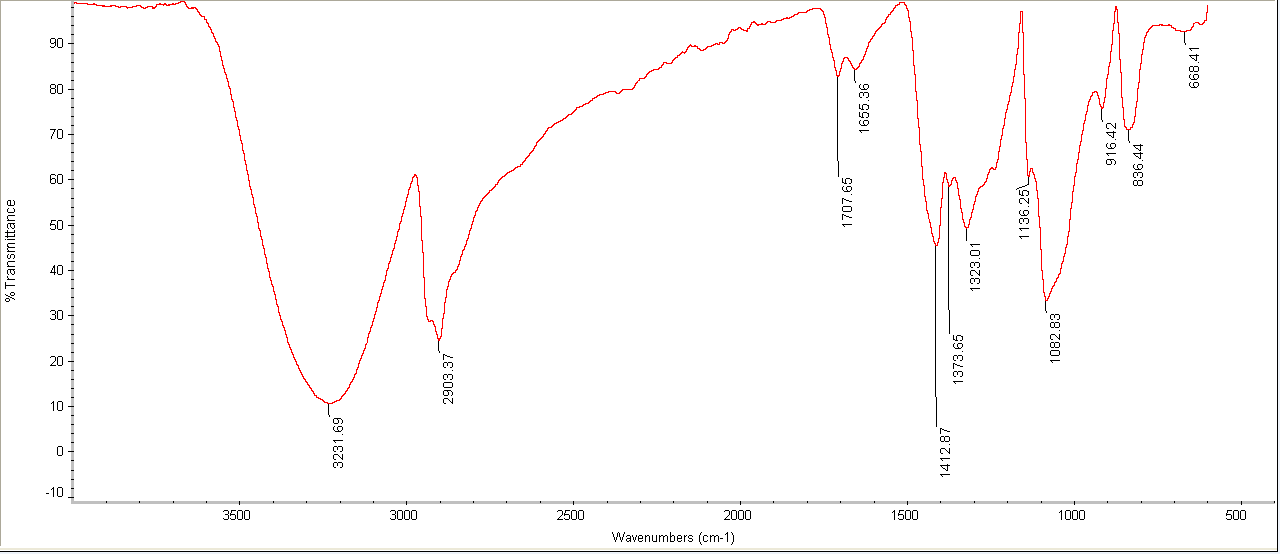


**Fig. S1:** FT-IR spectrum of polyvinyl alcohol.


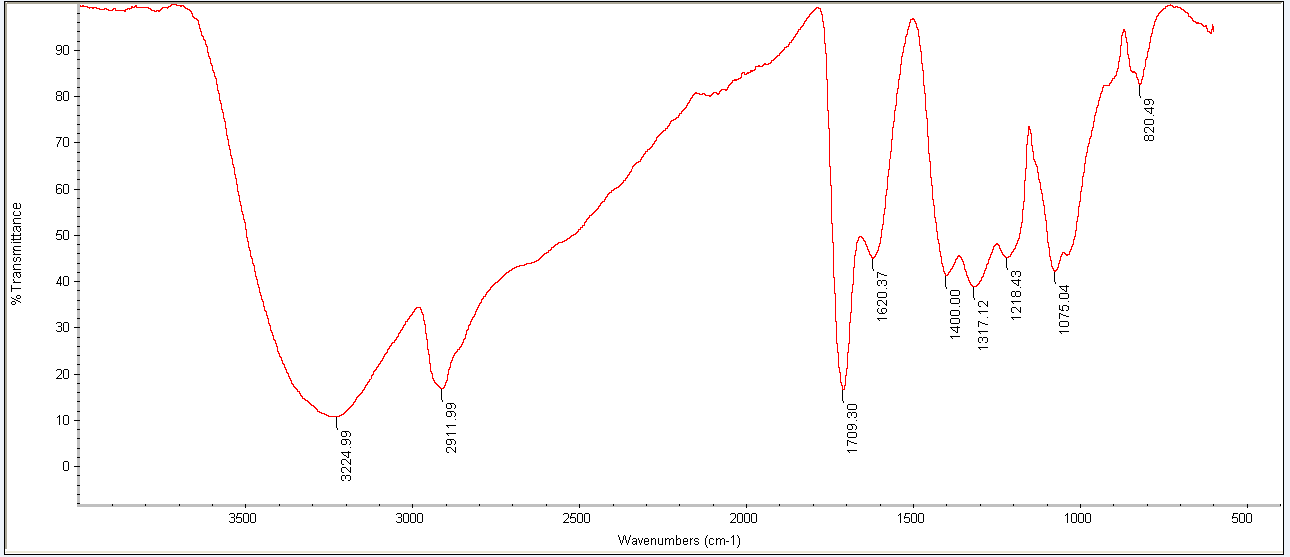


**Fig. S2:** FT-IR spectrum of PVA/Cu nanocomposite.


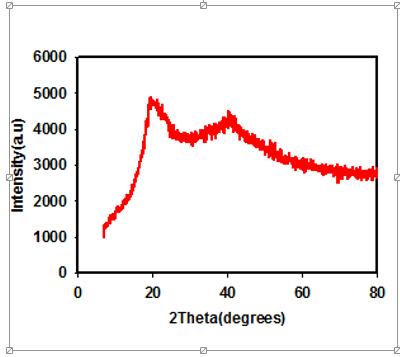


**Fig. S3:** XRD diffraction pattern of PVA/Cu nanocomposite.


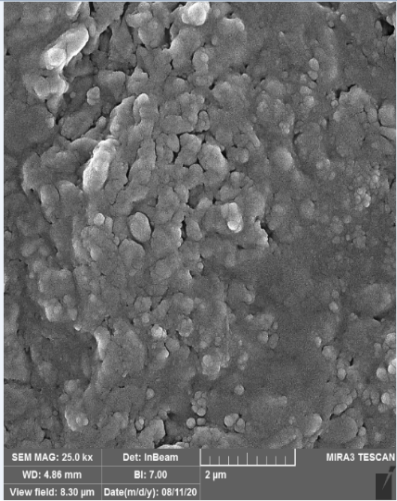

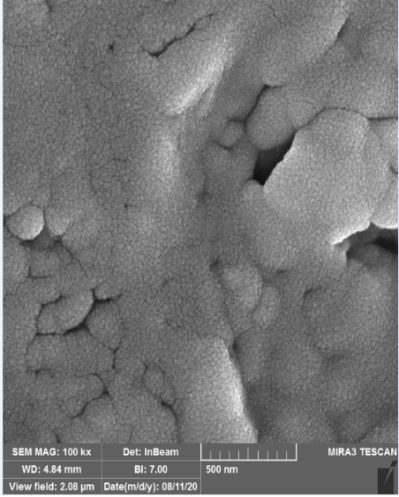

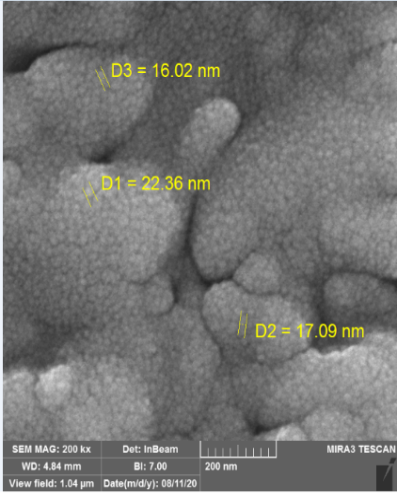


**Fig. S4:** FE-SEM image of PVA/Cu nanocomposite


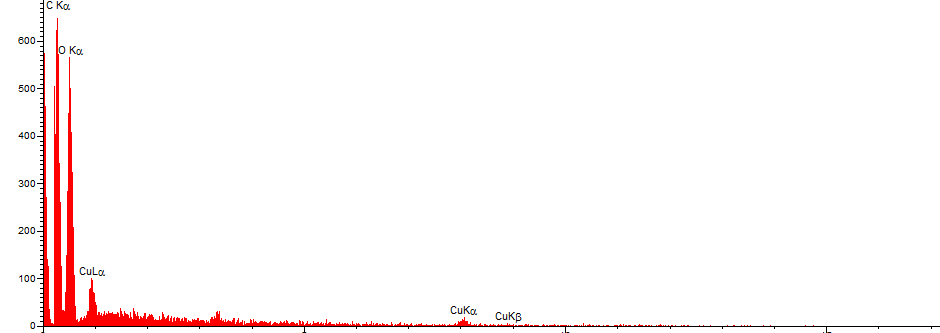


**Fig. S5:** EDS spectrum of PVA/Cu nanocomposite.
